# Supplementary material for: Addressing preliminary challenges in upscaling the recovery of lithium from spent lithium ion batteries by the electrochemical method: a review
Source: Royal Society of Chemistry journal article supplement (doi:10.1039/d4ra00972j), 2024-01-01
Supplement: d4ra00972j1.pdf [file d4ra00972j1.pdf]

## ELECTRONIC SUPPLEMENTARY INFORMATION

### Preliminary Challenges in Upscaling the Recovery of Lithium from Spent Lithium-ion Batteries by Electrochemical Method: A Review

Mohamad Arif Kasri<sup>1,2</sup>, Muhammad Zharfan Mohd Halizan<sup>2</sup>, Irina Harun<sup>3</sup>, Fadzli Irwan Bahrudin<sup>4</sup>, Nuraini Daud<sup>5</sup>, Muhammad Faiz Aizamddin<sup>6</sup>, Siti Nur Amira Shaffee<sup>6</sup>, Norazah Abd Rahman<sup>7</sup>, Saiful Arifin Shafiee<sup>1\*</sup>, Mohd Muzamir Mahat<sup>2\*</sup>

**Table S1.** Preliminary economic analysis for recovery of one-ton scrap  $\text{LiMn}_2\text{O}_4$  by slurry electrolysis. <sup>1</sup>

|                     |                                                     |                                 |                        |                      |
|---------------------|-----------------------------------------------------|---------------------------------|------------------------|----------------------|
| <b>Revenue</b>      | <b>Products</b>                                     | <b>Mass (kg)</b>                | <b>Price (USD/kg)</b>  | <b>Benefits (\$)</b> |
|                     | $\text{Li}_2\text{CO}_3$                            | 92.74                           | 12.00                  | 1112.88              |
|                     | $\text{MnO}_2$                                      | 441.42                          | 2.20                   | 971.12               |
|                     | $\text{Na}_2\text{SO}_4 \cdot 10\text{H}_2\text{O}$ | 1965.00                         | 0.09                   | 176.85               |
|                     | <b>Total</b>                                        | -                               |                        | <b>2260.85</b>       |
| <b>Energy cost</b>  | <b>Procedure</b>                                    | <b>Energy consumption (kWh)</b> | <b>Price (USD*kWh)</b> | <b>Cost (\$)</b>     |
|                     | Slurry electrolysis                                 | 1173.33                         | 0.15                   | -176.00              |
|                     | Filtering, drying and sieving                       | 230                             | 0.15                   | -34.50               |
|                     | Evaporative crystallization                         | 1100                            | 0.15                   | -165.00              |
|                     | Freeze crystallisation                              | 110                             | 0.15                   | -16.50               |
|                     | <b>Total</b>                                        | 2613.33                         | 0.15                   | <b>-392.00</b>       |
| <b>Reagent cost</b> | <b>Reagents</b>                                     | <b>Dosage (kg)</b>              | <b>Price (USD/kg)</b>  | <b>Cost (\$)</b>     |
|                     | NaOH                                                | 488.20                          | 0.60                   | -292.92              |
|                     | $\text{H}_2\text{SO}_4$                             | 598.05                          | 0.25                   | -149.51              |
|                     | <b>Total</b>                                        |                                 |                        | <b>-442.43</b>       |
| <b>Net profit</b>   |                                                     |                                 |                        | <b>1426.42</b>       |

**Table S2.** Preliminary economic analysis for recovery of one-ton scrap  $\text{LiMn}_2\text{O}_4$  by various methods. <sup>1</sup>

| Process                               | Reagent cost (USD) | Energy cost (USD) | Revenue | Profit  | Reference |
|---------------------------------------|--------------------|-------------------|---------|---------|-----------|
| Pyrometallurgy                        | -                  | 559.05            | 1687.14 | 1128.09 | 2         |
| Hydrometallurgy                       | -                  | 387.53            | 1237.78 | 850.25  | 3         |
| Hydrometallurgy                       | 659.28             | 415.5             | 1303.10 | 228.32  | 4         |
| Electrochemical (slurry electrolysis) | 442.43             | 392.00            | 2260.85 | 1426.42 | 1         |

**Table S3.** Economic analysis for recycling one ton of spent LiFePO<sub>4</sub> batteries by the electrochemical method (suspension electrodialysis) in China (exchange rate: 1 USD = 6.72 CNY).<sup>5</sup>

| <b>Revenue</b>     | <b>Products</b>               | <b>Mass (kg)</b>                | <b>Price (USD/kg)</b>  | <b>Benefits (USD)</b> |
|--------------------|-------------------------------|---------------------------------|------------------------|-----------------------|
|                    | LiOH·H <sub>2</sub> O         | 84.28                           | 15.00 <sup>10</sup>    | 1264.20               |
|                    | FePO <sub>4</sub>             | 302.45                          | 1.00 <sup>11</sup>     | 302.45                |
|                    | <b>Total</b>                  |                                 | -                      | <b>1566.65</b>        |
| <b>Energy cost</b> | <b>Procedure</b>              | <b>Energy consumption (kWh)</b> | <b>Price (USD*kWh)</b> | <b>Cost (USD)</b>     |
|                    | Suspension electrodialysis    | 1742.40                         | 0.15                   | -261.36               |
|                    | Filtering, drying and sieving | 230.00                          | 0.15                   | -34.50                |
|                    | Evaporative crystallisation   | 802.67                          | 0.15                   | -120.40               |
|                    | <b>Total</b>                  |                                 | -                      | <b>-416.26</b>        |
| <b>Net profit</b>  |                               |                                 |                        | <b>1150.39</b>        |

**Table S4.** Preliminary economic analysis for recovery of one-ton spent LFP batteries in various methods.<sup>5</sup>

| <b>Products</b>                                                                         | <b>Reagent cost (USD)</b> | <b>Energy cost (USD)</b> | <b>Revenue (USD)</b> | <b>Profit (USD)</b> | <b>References</b> |
|-----------------------------------------------------------------------------------------|---------------------------|--------------------------|----------------------|---------------------|-------------------|
| Li <sub>2</sub> CO <sub>3</sub> , FePO <sub>4</sub>                                     | 275.70                    | 219.00                   | 1272.2               | 777.5               | 6                 |
| Li <sub>2</sub> CO <sub>3</sub> , FePO <sub>4</sub>                                     | 274.22                    | 106.50                   | 1329.90              | 949.18              | 7                 |
| Li <sub>3</sub> PO <sub>4</sub> ,<br>FeC <sub>2</sub> O <sub>4</sub> ·2H <sub>2</sub> O | 858.00                    | 77.88                    | 1901.13              | 965.25              | 8                 |
| LiOH·H <sub>2</sub> O, FePO <sub>4</sub>                                                | -                         | 416.26                   | 1566.65              | 1150.39             | 5                 |

## REFERENCES

1. Li, Z., He, L., Zhao, Z. wei, Wang, D. & Xu, W. Recovery of Lithium and Manganese from Scrap  $\text{LiMn}_2\text{O}_4$  by Slurry Electrolysis. *ACS Sustain Chem Eng* **7**, 16738–16746 (2019).
2. Xiao, J., Li, J. & Xu, Z. Recycling metals from lithium ion battery by mechanical separation and vacuum metallurgy. *J Hazard Mater* **338**, 124–131 (2017).
3. Kondás, J., Jandová, J. & Nemeckova, M. Processing of spent Li/MnO<sub>2</sub> batteries to obtain  $\text{Li}_2\text{CO}_3$ . *Hydrometallurgy* **84**, 247–249 (2006).
4. Meshram, P., Abhilash, Pandey, B. D., Mankhand, T. R. & Deveci, H. Comparison of Different Reductants in Leaching of Spent Lithium Ion Batteries. *JOM* **68**, 2613–2623 (2016).
5. Li, Z., He, L., Zhu, Y. & Yang, C. A Green and Cost-Effective Method for Production of LiOH from Spent  $\text{LiFePO}_4$ . *ACS Sustain Chem Eng* **8**, 15915–15926 (2020).
6. Zhang, J. *et al.* Sustainable and Facile Method for the Selective Recovery of Lithium from Cathode Scrap of Spent  $\text{LiFePO}_4$  Batteries. *ACS Sustain Chem Eng* **7**, 5626–5631 (2019).
7. Yang, Y. *et al.* A Closed-Loop Process for Selective Metal Recovery from Spent Lithium Iron Phosphate Batteries through Mechanochemical Activation. *ACS Sustain Chem Eng* **5**, 9972–9980 (2017).
8. Fan, E. *et al.* Selective Recovery of Li and Fe from Spent Lithium-Ion Batteries by an Environmentally Friendly Mechanochemical Approach. *ACS Sustain Chem Eng* **6**, 11029–11035 (2018).
